# Supplementary material for: Evaluation of the Photocatalytic Activity of Distinctive-Shaped ZnO Nanocrystals Synthesized Using Latex of Different Plants Native to the Amazon Rainforest
Source: MDPI journal article supplement (doi:10.3390/nano12162889), 2022-08-22
Supplement: s1 [file s1]

## Supplementary Materials

# Evaluation of the Photocatalytic Activity of Distinctive-Shaped ZnO Nanocrystals Synthesized Using Latex of Different Plants Native to the Amazon Rainforest

Robert S. Matos <sup>1,2</sup>, John M. Attah-Baah <sup>3</sup>, Michael D. S. Monteiro <sup>3</sup>, Benilde F. O. Costa <sup>4</sup>, Marcelo A. Mâcedo <sup>3</sup>, Simone P. A. Da Paz <sup>5</sup>, Rômulo S. Angélica <sup>5</sup>, Tiago M. de Souza <sup>6</sup>, Ștefan Țălu <sup>7,\*</sup>, Rosane M. P. B. Oliveira <sup>1</sup> and Nilson S. Ferreira <sup>3,\*</sup>

<sup>1</sup> Postgraduate Program in Materials Science and Engineering (P<sup>2</sup>CEM), Federal University of Sergipe, São Cristovão 49100-000, SE, Brazil

<sup>2</sup> Amazonian Materials Group, Federal University of Amapá (UNIFAP), Macapá 68911-477, AP, Brazil

<sup>3</sup> Laboratory of Corrosion and Nanotechnology (LCNT), Federal University of Sergipe, São Cristovão 49100-000, SE, Brazil

<sup>4</sup> CFisUC, Department of Physics, University of Coimbra, P-3004-516 Coimbra, Portugal

<sup>5</sup> Institute of Geosciences, Federal University of Pará, Belém 66075-110, PA, Brazil

<sup>6</sup> Núcleo de Engenharia de Materiais Sustentáveis (NEMaS), Universidade do Estado do Amapá, Macapá 68900-070, AP, Brazil

<sup>7</sup> The Directorate of Research, Development and Innovation Management (DMCDI), Technical University of Cluj-Napoca, 15 Constantin Daicoviciu St., 400020 Cluj-Napoca, Romania

\* Correspondence: stefan\_ta@yahoo.com (Ș.T.); nilson@academico.ufs.br (N.S.F.)

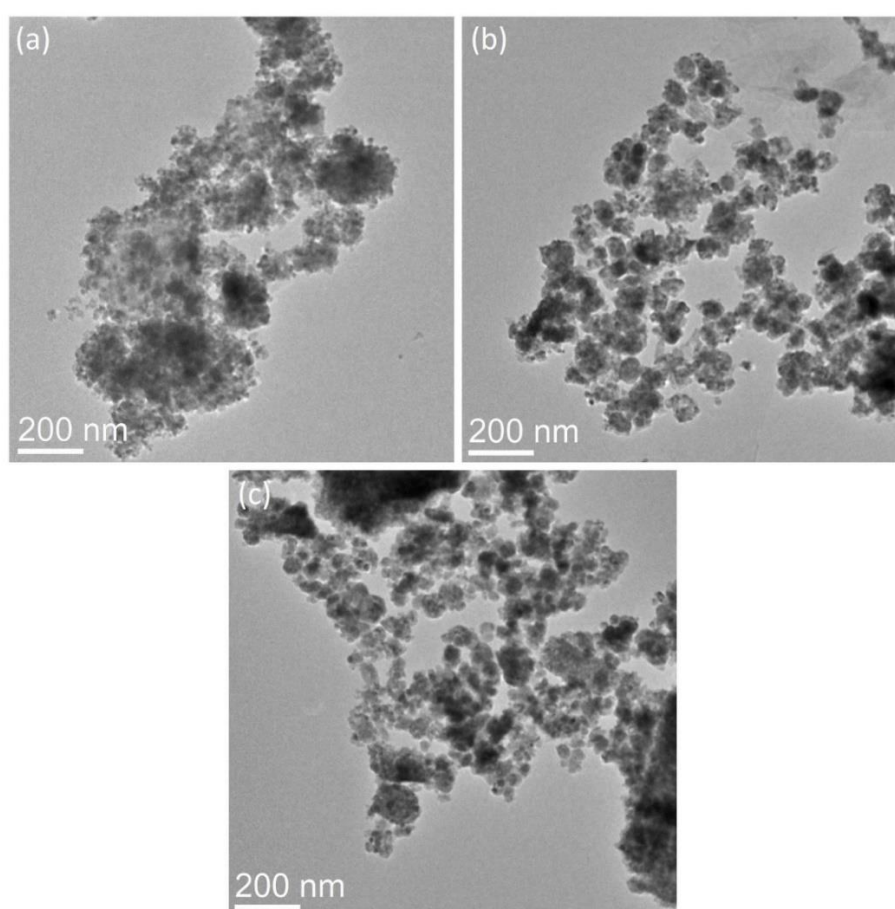

**Figure S1.** TEM images of (a) pitanga-like, (b) teetotum-like, and (c) cambuci-like ZnO nanoparticles.

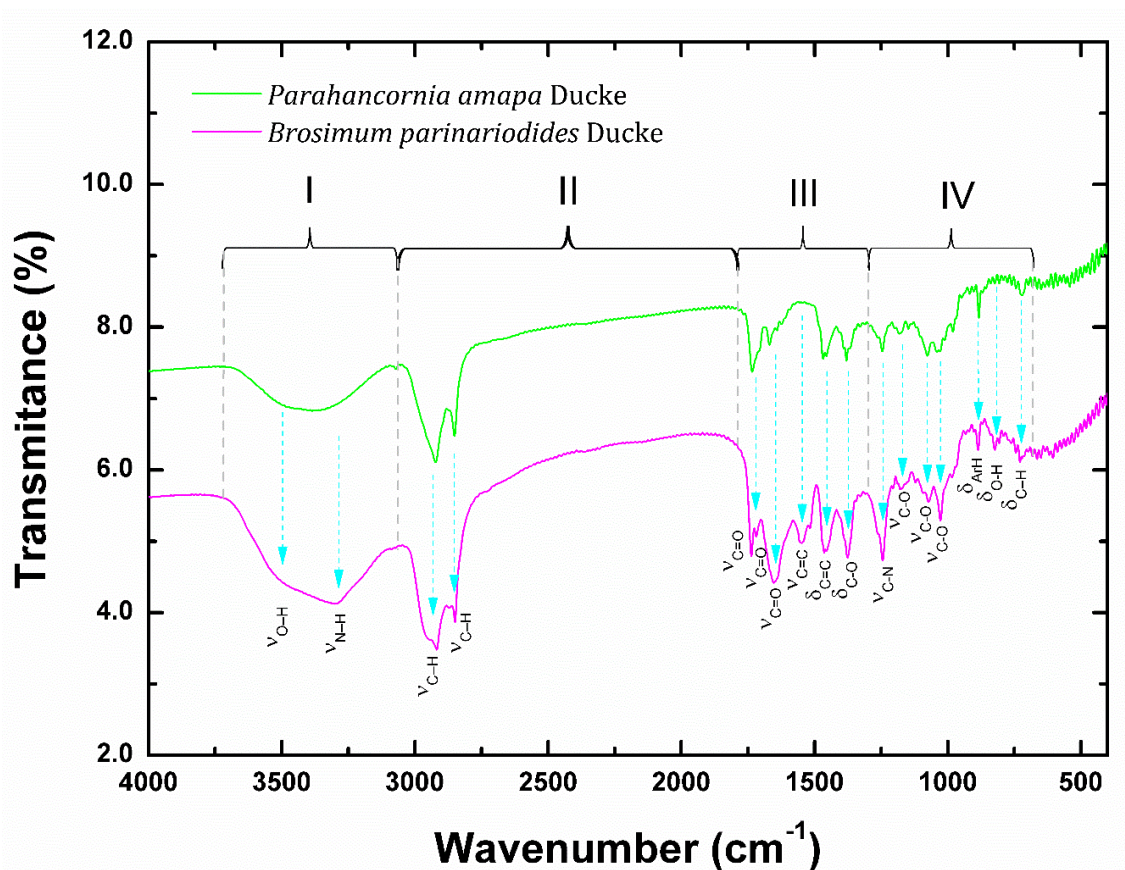

**Figure S2.** FTIR Spectra of freeze dried Bitter-Amapá (*Parahancornia amapa* Ducke) and Sweet-Amapá (*Brosimum parinarioides* Ducke) Amazon rainforest latex.
